# Supplementary material
Source: PubMed Central journal article supplement (PMC6214343)
Supplement: NIHMS993101-supplement-1.pdf [file NIHMS993101-supplement-1.pdf]

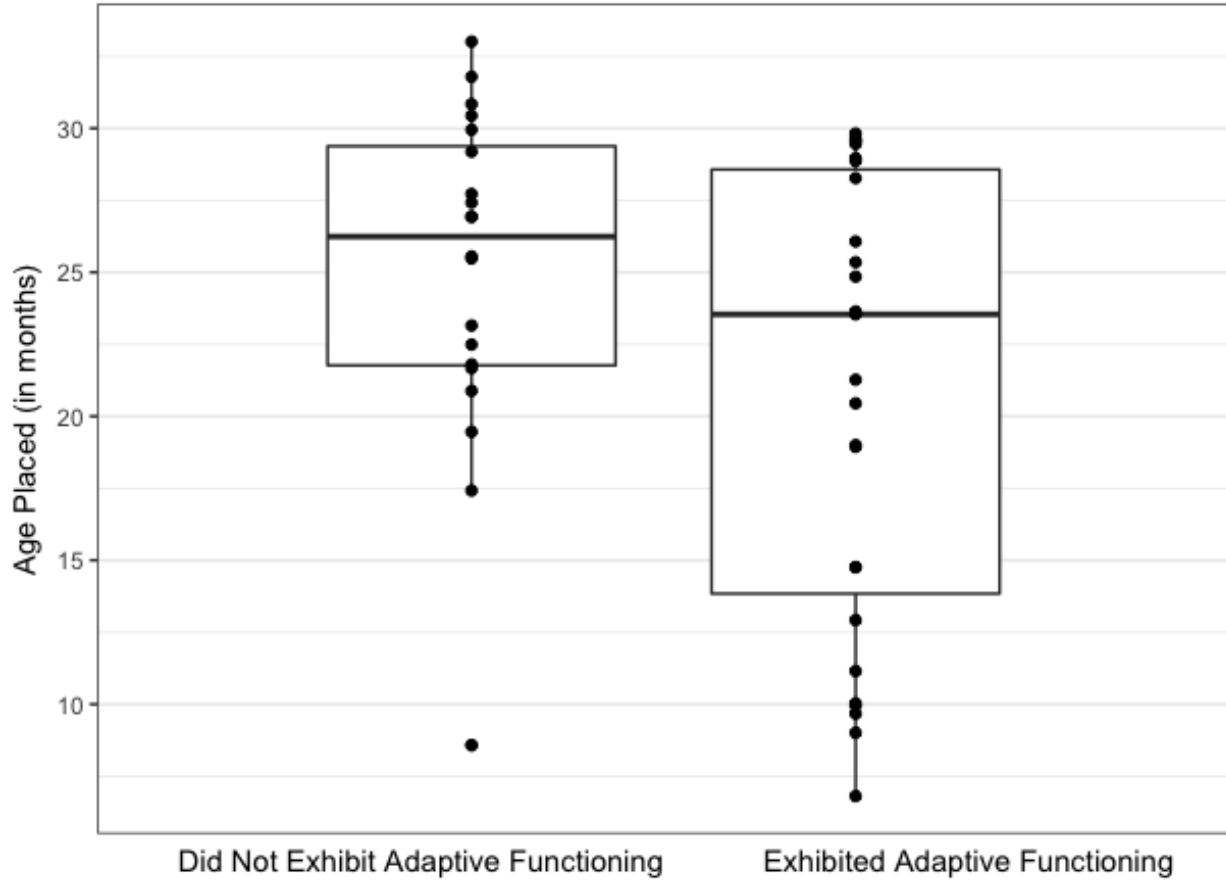

Supplemental Figure 1. Boxplot of age of placement into study sponsored foster families for the foster care group by adaptive functioning determination.
